# Supplementary material for: Novel m4C modification in type I restriction-modification systems
Source: PubMed Central journal article supplement — Nucleic Acids Res. 2016 Aug 31;44(19):9413–25. doi: 10.1093/nar/gkw743 (PMC5100572; doi:10.1093/nar/gkw743), 2016-08-31
Supplement: supp_gkw743_nar-01138-h-2016-File002.pdf [file supp_gkw743_nar-01138-h-2016-File002.pdf]

## Supplementary Figure S1.

SMRT methylome analysis results for six native bacterial strains that have 2-MTase Type I R-M systems. All six methylomes indicate a split recognition motif characteristic of Type I R-M systems, but in which one strand contains m4C modification and one strand m6A modification. Additional modification motifs identified for these strains are also shown.

### DSM 2075: *Desulfarculus baarsii*

| Reports for Job DSM2075 |                   |                   |                   |                      |                       |                      |                     |               |  |
|-------------------------|-------------------|-------------------|-------------------|----------------------|-----------------------|----------------------|---------------------|---------------|--|
| SMRT Cells: 2 Movies: 2 |                   |                   |                   |                      |                       |                      |                     |               |  |
| Motif                   | Modified Position | Modification Type | % Motifs Detected | # Of Motifs Detected | # Of Motifs In Genome | Mean Modification QV | Mean Motif Coverage | Partner Motif |  |
| RGATCY                  | 3                 | m6A               | 94.74             | 4,517                | 4,768                 | 51.9                 | 28.5                | RGATCY        |  |
| GAAGNNNNNGGC            | 3                 | m6A               | 91.93             | 1,389                | 1,511                 | 49.7                 | 27.6                | GCCNNNNNCTTC  |  |
| GCCNNNNNCTTC            | 2                 | m4C               | 68.83             | 1,040                | 1,511                 | 41.9                 | 30.9                | GAAGNNNNNGGC  |  |
| AGAAAT                  | 5                 | m6A               | 88.37             | 661                  | 748                   | 47.8                 | 27.4                |               |  |
| CCGCGCC                 | 4                 | m4C               | 63.60             | 4,137                | 6,505                 | 40.8                 | 29.7                |               |  |
| Not Clustered           | 0                 |                   | 0.01              | 888                  | 7,296,419             | 34.2                 | 32.0                |               |  |

### DSM5219: *Methanohalophilus mahii*

| Reports for Job DSM_5219_3        |                   |                   |                   |                      |                       |                      |                     |               |  |
|-----------------------------------|-------------------|-------------------|-------------------|----------------------|-----------------------|----------------------|---------------------|---------------|--|
| # of SMRT Cells: 3 # of Movies: 5 |                   |                   |                   |                      |                       |                      |                     |               |  |
| Motif                             | Modified Position | Modification Type | % Motifs Detected | # Of Motifs Detected | # Of Motifs In Genome | Mean Modification QV | Mean Motif Coverage | Partner Motif |  |
| CGANNNNNRGA                       | 3                 | m6A               | 94.02             | 1,369                | 1,456                 | 57.7                 | 42.2                | TCYNNNNNTCG   |  |
| TCYNNNNNTCG                       | 2                 | m4C               | 72.46             | 1,055                | 1,456                 | 46.6                 | 42.3                | CGANNNNNRGA   |  |
| CGADNNNNWAGCT                     | 3                 | m6A               | 82.61             | 19                   | 23                    | 45.5                 | 41.8                |               |  |
| AGCT                              | 3                 | m4C               | 80.96             | 7,380                | 9,116                 | 50.2                 | 41.3                | AGCT          |  |
| Not Clustered                     | 0                 |                   | 0.02              | 931                  | 4,012,797             | 34.8                 | 45.7                |               |  |

### DSM 2380: *Pelobacter carbinolicus*

| Reports for Job DSM_2380_4        |                   |                   |                   |                      |                       |                      |                     |               |  |
|-----------------------------------|-------------------|-------------------|-------------------|----------------------|-----------------------|----------------------|---------------------|---------------|--|
| # of SMRT Cells: 4 # of Movies: 8 |                   |                   |                   |                      |                       |                      |                     |               |  |
| Motif                             | Modified Position | Modification Type | % Motifs Detected | # Of Motifs Detected | # Of Motifs In Genome | Mean Modification QV | Mean Motif Coverage | Partner Motif |  |
| GACGAG                            | 5                 | m6A               | 80.96             | 1,033                | 1,276                 | 46.4                 | 29.3                |               |  |
| CGCANNNNNGGC                      | 4                 | m6A               | 75.87             | 676                  | 891                   | 46.3                 | 29.8                | GCCNNNNNTGCG  |  |
| GCCNNNNNTGCG                      | 2                 | m4C               | 52.53             | 468                  | 891                   | 40.8                 | 31.1                | CGCANNNNNGGC  |  |
| Not Clustered                     | 0                 |                   | 0.02              | 1,292                | 7,328,728             | 34.0                 | 35.8                |               |  |

### DSM12260: *Aminomonas paucivorans*

| Reports for Job DSM12260_mods_6poorcels |                   |                   |                   |                      |                       |                      |                     |               |  |
|-----------------------------------------|-------------------|-------------------|-------------------|----------------------|-----------------------|----------------------|---------------------|---------------|--|
| SMRT Cells: 6 Movies: 6                 |                   |                   |                   |                      |                       |                      |                     |               |  |
| Motif                                   | Modified Position | Modification Type | % Motifs Detected | # Of Motifs Detected | # Of Motifs In Genome | Mean Modification QV | Mean Motif Coverage | Partner Motif |  |
| CAGNNNNCTCG                             | 2                 | m6A               | 30.07             | 138                  | 459                   | 42.4                 | 18.4                | CGAGNNNNCTCG  |  |
| CGAGNNNNCTCG                            | 3                 | m6A               | 25.49             | 117                  | 459                   | 44.0                 | 18.4                | CAGNNNNCTCG   |  |
| GGAGNNNNNGGC                            | 3                 | m6A               | 20.29             | 648                  | 3,194                 | 41.1                 | 18.7                |               |  |
| Not Clustered                           | 0                 |                   | 0.06              | 3,089                | 5,256,228             | 34.9                 | 26.7                |               |  |

### DSM 2522: *Bacillus cellulosilyticus*

| Reports for Job DSM_2522_3        |                   |                   |                   |                      |                       |                      |                     |               |  |
|-----------------------------------|-------------------|-------------------|-------------------|----------------------|-----------------------|----------------------|---------------------|---------------|--|
| # of SMRT Cells: 3 # of Movies: 5 |                   |                   |                   |                      |                       |                      |                     |               |  |
| Motif                             | Modified Position | Modification Type | % Motifs Detected | # Of Motifs Detected | # Of Motifs In Genome | Mean Modification QV | Mean Motif Coverage | Partner Motif |  |
| GAGNNNNNGGG                       | 2                 | m6A               | 97.47             | 732                  | 751                   | 61.0                 | 37.2                | CCCNNNNNCTC   |  |
| CCCNNNNNCTC                       | 2                 | m4C               | 66.44             | 499                  | 751                   | 43.6                 | 39.1                | GAGNNNNNGGG   |  |
| RCDGCAGCNV                        | 2                 | m4C               | 37.32             | 228                  | 611                   | 41.2                 | 41.6                |               |  |
| Not Clustered                     | 0                 |                   | 0.04              | 3,707                | 9,361,231             | 35.9                 | 42.3                |               |  |

### DSM14238: *Aequorivita sublithicola*

| Reports for Job DSM_14238_4       |                   |                   |                   |                      |                       |                      |                     |               |  |
|-----------------------------------|-------------------|-------------------|-------------------|----------------------|-----------------------|----------------------|---------------------|---------------|--|
| # of SMRT Cells: 4 # of Movies: 8 |                   |                   |                   |                      |                       |                      |                     |               |  |
| Motif                             | Modified Position | Modification Type | % Motifs Detected | # Of Motifs Detected | # Of Motifs In Genome | Mean Modification QV | Mean Motif Coverage | Partner Motif |  |
| GAANNNNCTGGAG                     | 13                | m6A               | 100.00            | 40                   | 40                    | 61.9                 | 51.3                |               |  |
| CGTRAC                            | 5                 | m6A               | 99.79             | 1,433                | 1,436                 | 74.4                 | 52.1                |               |  |
| AGGAAG                            | 5                 | m6A               | 99.79             | 2,344                | 2,349                 | 78.0                 | 51.4                |               |  |
| CCANNNNNTTC                       | 3                 | m6A               | 99.39             | 2,286                | 2,300                 | 75.5                 | 52.9                | GAANNNNNTGG   |  |
| GAANNNNNTGG                       | 3                 | m6A               | 98.96             | 2,276                | 2,300                 | 71.9                 | 52.5                | CCANNNNNTTC   |  |
| GGANNNNNGGC                       | 3                 | m6A               | 96.37             | 770                  | 799                   | 70.9                 | 53.4                | GCCNNNNNTCC   |  |
| GCCNNNNNTCC                       | 2                 | m4C               | 94.12             | 752                  | 799                   | 57.1                 | 54.0                | GGANNNNNGGC   |  |
| CATG                              | 2                 | m6A               | 93.76             | 5,067                | 5,404                 | 65.2                 | 53.5                | CATG          |  |
| Not Clustered                     | 0                 |                   | 0.10              | 6,996                | 7,025,915             | 36.6                 | 57.2                |               |  |

## Supplementary Figure S2.

SMRT methylome analysis results for each of the 2-MTase Type I systems identified in Figure S1, here expressed in the non-methylating *E. coli* host ER2796. The expression constructs contain the MTase only (ie, both MTase genes and the S (specificity) gene, but not the endonuclease gene). Differences in the "percent Motifs detected" reflect differing levels of coverage. The multiple, closely related putative motifs for DbaKI reflect both potential 'star activity' from expression in *E. coli*, and also over-calling by the SMRT analysis software.

### DbaKI from DSM 2075: *Desulfarculus baarsii*

| Reports for Job DbaKI M1M2S_pACYC_2796 |                   |                   |                   |                      |                       |                      |                     |               |
|----------------------------------------|-------------------|-------------------|-------------------|----------------------|-----------------------|----------------------|---------------------|---------------|
| SMRT Cells: 1 Movies: 1                |                   |                   |                   |                      |                       |                      |                     |               |
| Motif Summary                          |                   |                   |                   |                      |                       |                      |                     |               |
| Motifs                                 | Modified Position | Modification Type | % Motifs Detected | # Of Motifs Detected | # Of Motifs In Genome | Mean Modification QV | Mean Motif Coverage | Partner Motif |
| GCCNNNNCTTC                            | 2                 | m4C               | 97.74%            | 908                  | 929                   | 58.81                | 46.51               |               |
| GAAGNNNNNGDC                           | 3                 | m6A               | 86.42%            | 1935                 | 2239                  | 65.51                | 43.46               |               |
| GAAGNNNNVAGC                           | 3                 | m6A               | 51.72%            | 301                  | 582                   | 46.27                | 44.53               |               |
| GWAAGNNNNNGGC                          | 4                 | m6A               | 40.29%            | 166                  | 412                   | 47.39                | 43.38               |               |
| GAAATNNNVGGC                           | 3                 | m6A               | 30.48%            | 64                   | 210                   | 38.31                | 46.55               |               |
| GACNNNNCTTC                            | 2                 | m6A               | 30.2%             | 183                  | 606                   | 50.23                | 46.61               |               |
| GAAGNNNNNGGAS                          | 3                 | m6A               | 28.35%            | 55                   | 194                   | 41.84                | 47.15               |               |
| GCTNNNNHCTTCH                          | 2                 | m4C               | 20.77%            | 76                   | 366                   | 43.17                | 46.97               |               |
| GCCNNNVCTTWC                           | 2                 | m4C               | 17.39%            | 56                   | 322                   | 44.25                | 48.07               |               |

### Mma5219I from DSM5219: *Methanohalophilus mahii*

| Reports for Job DSM5219_MScClone_vs_2796 |                   |                   |                   |                      |                       |                      |                     |               |
|------------------------------------------|-------------------|-------------------|-------------------|----------------------|-----------------------|----------------------|---------------------|---------------|
| SMRT Cells: 1 Movies: 1                  |                   |                   |                   |                      |                       |                      |                     |               |
| Motif Summary                            |                   |                   |                   |                      |                       |                      |                     |               |
| Motif                                    | Modified Position | Modification Type | % Motifs Detected | # Of Motifs Detected | # Of Motifs In Genome | Mean Modification QV | Mean Motif Coverage | Partner Motif |
| CGANNNNNRGA                              | 3                 | m6A               | 73.43             | 2,957                | 4,027                 | 43.8                 | 25.3                | TCYNNNNNTCG   |
| TCYNNNNNTCG                              | 2                 | unknown           | 33.00             | 1,329                | 4,027                 | 37.7                 | 27.1                | CGANNNNNRGA   |
| CGANNVNAAGCD                             | 3                 | m6A               | 32.68             | 133                  | 407                   | 48.0                 | 53.2                |               |
| Not Clustered                            | 0                 |                   | 0.01              | 864                  | 9,117,747             | 37.2                 | 144.5               |               |

### PcaI from DSM 2380: *Pelobacter carbinolicus*

| Reports for Job DSM2380_MScClone_vs_2796 |                   |                   |                   |                      |                       |                      |                     |               |
|------------------------------------------|-------------------|-------------------|-------------------|----------------------|-----------------------|----------------------|---------------------|---------------|
| SMRT Cells: 1 Movies: 1                  |                   |                   |                   |                      |                       |                      |                     |               |
| Motif Summary                            |                   |                   |                   |                      |                       |                      |                     |               |
| Motif                                    | Modified Position | Modification Type | % Motifs Detected | # Of Motifs Detected | # Of Motifs In Genome | Mean Modification QV | Mean Motif Coverage | Partner Motif |
| CGCANNNNNGGC                             | 4                 | m6A               | 15.85             | 155                  | 978                   | 35.6                 | 17.6                |               |
| Not Clustered                            | 0                 |                   | 0.00              | 266                  | 9,125,230             | 44.0                 | 628.7               |               |

### Apa12260I from DSM12260: *Aminomonas paucivorans*

| Reports for Job Apa12260_pACYC1_new_MODS |                   |                   |                   |                      |                       |                      |                     |               |
|------------------------------------------|-------------------|-------------------|-------------------|----------------------|-----------------------|----------------------|---------------------|---------------|
| SMRT Cells: 1 Movies: 1                  |                   |                   |                   |                      |                       |                      |                     |               |
| Motif Summary                            |                   |                   |                   |                      |                       |                      |                     |               |
| Motifs                                   | Modified Position | Modification Type | % Motifs Detected | # Of Motifs Detected | # Of Motifs In Genome | Mean Modification QV | Mean Motif Coverage | Partner Motif |
| GGAGNNNNNGGC                             | 3                 | m6A               | 100.0%            | 374                  | 374                   | 113.96               | 78.18               | GCCNNNNCTCC   |
| GCCNNNNCTCC                              | 2                 | m4C               | 100.0%            | 374                  | 374                   | 84.89                | 79.31               | GGAGNNNNNGGC  |

### BceNI from DSM 2522: *Bacillus cellulosilyticus*

| Reports for Job DSM2522_MScClone_vs_2796 |                   |                   |                   |                      |                       |                      |                     |               |
|------------------------------------------|-------------------|-------------------|-------------------|----------------------|-----------------------|----------------------|---------------------|---------------|
| SMRT Cells: 1 Movies: 1                  |                   |                   |                   |                      |                       |                      |                     |               |
| Motif Summary                            |                   |                   |                   |                      |                       |                      |                     |               |
| Motif                                    | Modified Position | Modification Type | % Motifs Detected | # Of Motifs Detected | # Of Motifs In Genome | Mean Modification QV | Mean Motif Coverage | Partner Motif |
| GAGNNNNNGG                               | 2                 | m6A               | 47.19             | 411                  | 871                   | 39.2                 | 17.8                |               |
| Not Clustered                            | 0                 |                   | 0.00              | 316                  | 9,125,337             | 33.8                 | 26.3                |               |

### Asu14238II from DSM14238: *Aequorivita sublithincola*

| Reports for Job DSM14238_MScClone_vs_2796 |                   |                   |                   |                      |                       |                      |                     |               |
|-------------------------------------------|-------------------|-------------------|-------------------|----------------------|-----------------------|----------------------|---------------------|---------------|
| SMRT Cells: 1 Movies: 1                   |                   |                   |                   |                      |                       |                      |                     |               |
| Motif Summary                             |                   |                   |                   |                      |                       |                      |                     |               |
| Motif                                     | Modified Position | Modification Type | % Motifs Detected | # Of Motifs Detected | # Of Motifs In Genome | Mean Modification QV | Mean Motif Coverage | Partner Motif |
| GGANNNNNGGC                               | 3                 | m6A               | 31.85             | 709                  | 2,226                 | 37.4                 | 28.5                |               |
| Not Clustered                             | 0                 |                   | 0.01              | 633                  | 9,123,982             | 34.0                 | 41.3                |               |
